# Supplementary material for: Neurological and neuropsychological consequences of electrical and lightning shock: review and theories of causation
Source: PubMed Central journal article supplement — Neural Regen Res. 2017 May;12(5):677–86. doi: 10.4103/1673-5374.206636 (PMC5461597; doi:10.4103/1673-5374.206636), 2017-05
Supplement: NRR-12-677_Suppl1.pdf [file NRR-12-677_Suppl1.pdf]

**Additional file:**

**Open peer review report 1 on “Neurological and neuropsychological consequences of electrical and lightning shock: review and theories of causation”.**

**Reviewer:** Gentian Vyshka, University of Medicine in Tirana, Albania

**Comments to the author:**

The point of view of a new conceptual classification of neurological sequelae following an electrical shock is a very interesting point. Nevertheless, this point of view is to some extent empirical.

Most important, A LARGE NUMBER OR REFERENCES ARE INCORRECT OR INCOMPLETE, with missing data... even the name of the journal quoted, in some cases. Below you have the full list of REFERENCES TO BE CORRECTED:

REFERENCES to include MISSING PAGES (quoted), JOURNAL NAME etc.:

Andrews C (2017) Electrical Theory for the Non-Electrical: Understanding Electrical Conduction in the Body, and Electrical Injuries. In.

Andrews CJ (1993) Studies in Aspects of Lightning Injuries. In: Elec Engg. Brisbane Australia: Univ Qld., Australia.

Andrews CJ (2012) The Origin Of Remote Symptoms In Electrical And Lightning Injuries: An Attempt At Explanation And A Hypothesis For Testing. Journ Light Res 1.

Farina FR, Mitchell KJ, Roche RAP (2016) Synaesthesia lost and found: Two cases of person- and music-colour synaesthesia. European Journal of Neuroscience.

Gouse M, Arockiaraj J, Khanapur R, Srinivasan G (2015) Transient paraplegia in an elderly due to lightning injury: An unusual cause. Journal of Emergencies, Trauma and Shock 8.

Kruja J, Kuqo A, Grabova S, Rroji A, Vyshka G (2016) Right Hemispheric Leukoencephalopathy as an Incidental Finding Following a Lightning Strike. 2016 4:3.

Lakshminarayanan S, Chokroverty S, Eshkar N, Grewal R (2008) The spinal cord in lightning injury: A report of two cases. J Neurol Sci

Low YS (1976) Delayed Neurological Manifestations Secondary to Electrical Injury - A Case Report. Singapore Medical Journal 17:58-60.

Modayil P, Lloyd G, Mallik A, Bowdler D (2013) Inner Ear Damage Following Electric Current and Lightning Injury: a literature review. In: Eur Arch Otorhino, 7 May 2013 Edition.

Steffen D, Schoneweis D, Nelssen J (1992) Hind Limb Paralysis from Electrical Shock in Three Gilts. JAVMA 200:812- 813.

Wakasugi C, Masui M (1986) Secondary brain hemorrhages associated with lightning stroke: report of a case. *Nihon hoigaku zasshi* = The Japanese journal of legal medicine 40:42-46.
